# Supplementary material for: Built form and depression among the Chinese rural elderly: a cross-sectional study
Source: HighWire-hosted journal article supplement (doi:10.1136/bmjopen-2020-038572), 2020-12-01
Supplement: bmjopen-2020-038572supp001_data_supplement.pdf [file bmjopen-2020-038572supp001_data_supplement.pdf]

| <b>Model 1</b>                     |                     |       |
|------------------------------------|---------------------|-------|
|                                    | OR (95% CI)         | p     |
| <b>Female sex</b>                  | 0.718 (0.600-0.858) | 0.000 |
| <b>Age (years)</b>                 |                     |       |
| <b>60-64</b>                       | 1.00 (ref)          |       |
| <b>65-69</b>                       | 1.280 (0.996-1.643) | 0.053 |
| <b>70-74</b>                       | 1.501 (1.163-1.937) | 0.002 |
| <b>75-80</b>                       | 2.218 (1.705-2.885) | 0.000 |
| <b>≥80</b>                         | 3.611 (2.586-5.044) | 0.000 |
| <b>Education Level (years)</b>     |                     |       |
| <b>0</b>                           | 1.00 (ref)          |       |
| <b>6</b>                           | 0.619 (0.516-0.742) | 0.000 |
| <b>9</b>                           | 0.452 (0.329-0.622) | 0.000 |
| <b>12</b>                          | 0.365 (0.186-0.714) | 0.003 |
| <b>≥13</b>                         | 1.211 (0.412-3.561) | 0.728 |
| <b>Marital status</b>              |                     |       |
| <b>Married</b>                     | 1.00 (ref)          |       |
| <b>Single</b>                      | 1.226 (0.988-1.522) | 0.064 |
| <b>Living alone</b>                |                     |       |
| <b>No</b>                          | 1.00 (ref)          |       |
| <b>Yes</b>                         | 1.840 (1.372-2.469) | 0.000 |
| <b>Movement disorder</b>           |                     |       |
| <b>No</b>                          |                     |       |
| <b>Yes</b>                         |                     |       |
| <b>Number of NCDs</b>              |                     |       |
| <b>0</b>                           |                     |       |
| <b>1-2</b>                         |                     |       |
| <b>≥3</b>                          |                     |       |
| <b>Building Type</b>               |                     |       |
| <b>Apartment</b>                   |                     |       |
| <b>Cottage</b>                     |                     |       |
| <b>Living area (m<sup>2</sup>)</b> |                     |       |
| <b>&lt; 50</b>                     |                     |       |
| <b>51-100</b>                      |                     |       |
| <b>101-150</b>                     |                     |       |

151-200

201-250

> 250
